# Supplementary material for: Mitochondrial dysfunction in insulin resistance: differential contributions of chronic insulin and saturated fatty acid exposure in muscle cells
Source: PubMed Central journal article supplement — Biosci Rep. 2012 Aug 8;32(Pt 5):465–78. doi: 10.1042/BSR20120034 (PMC3475448; doi:10.1042/bsr20120034), 2012-08-08
Supplement: bsr0320465add.pdf [file bsr0320465add.pdf]

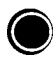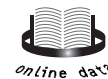

## SUPPLEMENTARY ONLINE DATA

## Mitochondrial dysfunction in insulin resistance: differential contributions of chronic insulin and saturated fatty acid exposure in muscle cells

Chenjing YANG\*<sup>1</sup>, Cho Cho AYE\*<sup>1</sup>, Xiaoxin LI\*, Angels DIAZ RAMOS†, Antonio ZORZANO† and Silvia MORA\*<sup>2</sup>

\*Department of Cellular and Molecular Physiology, Institute of Translational Medicine, University of Liverpool, Crown Street, Liverpool L69 3BX, U.K., and †Institute for Research in Biomedicine (IRB Barcelona), Department of Biochemistry and Molecular Biology, Universitat de Barcelona and CIBERDEM, Spain

**Table S1 List of primers used for quantitative real-time PCR**

| Gene           | Direction | Primer (5'→3')            |
|----------------|-----------|---------------------------|
| NRF1           | Forward   | GAACTGCCAACCCACAGTCAC     |
|                | Reverse   | TTTGTTCCACCTCTCCATCA      |
| PGC-1 $\alpha$ | Forward   | AACCACACCCACAGGATCAGA     |
|                | Reverse   | CTCTTCGCTTTATTGCTCCATG    |
| PGC-1 $\beta$  | Forward   | GGCCTTGTGTCAAGGTGGAT      |
|                | Reverse   | GGTGCTTATGCAGTTCCTGAC     |
| TFAM           | Forward   | CCGAAGTGTTTTCCAGCAT       |
|                | Reverse   | GGCTGCAATTTTCTAACCA       |
| COX2           | Forward   | GCCGACTAAATCAAGCAACA      |
|                | Reverse   | CAATGGGCATAAAGCTATGG      |
| COX4           | Forward   | TATGCTTTCCCCACTTACGC      |
|                | Reverse   | CACATCAGGCAAGGGGTAGT      |
| ATP6           | Forward   | AATTACAGGCTCCGACACAAAC    |
|                | Reverse   | TGGAATTAGTGAAATTGGAGTTCTC |
| UCP2           | Forward   | AAAGGGACCTCTCCAATGT       |
|                | Reverse   | GGTCGTCTGTCATGAGGTTG      |
| UCP3           | Forward   | TGCTGAGATGGTGACCTACG      |
|                | Reverse   | GCGTTCATGTATCGGGTCTT      |
| 18S            | Forward   | TCAAGAACGAAAGTCGGAGG      |
|                | Reverse   | GGACATCTAAGGGCATCACA      |
| Cyclophilin A  | Forward   | GCATACAGGTCCTGGCATCT      |
|                | Reverse   | TTACAGGACATTGCGAGCAG      |
| SOD1           | Forward   | CAGCATGGGTTCCACGTCCA      |
|                | Reverse   | CACATTGGCCACACCGTCTCT     |
| SOD2           | Forward   | CATTAACGCGCAGATCATGC      |
|                | Reverse   | CCCAAAGTCACGCTTGATAGC     |
| Catalase       | Forward   | CCAGCGACCAGATGAAGCAG      |
|                | Reverse   | CCACTCTCTCAGGAATCCGC      |
| Prdx III       | Forward   | GTTGCAGTTTCAGTGGATTCCC    |
|                | Reverse   | CTTTGGAAGCTGTTGGACTTGG    |
| Gptxl          | Forward   | GGGCAAGGTGCTGCTCATTG      |
|                | Reverse   | AGAGCGGGTGAGCCTTCTCA      |

Received 30 April 2012/25 June 2012; accepted 26 June 2012

Published as Immediate Publication 29 June 2012, doi 10.1042/BSR20120034

<sup>1</sup> These authors contributed equally to the work.<sup>2</sup> To whom correspondence should be addressed (email mora@liverpool.ac.uk).
